1 **Development of a Rapid Point-Of-Care Test that Measures Neutralizing Antibodies**  
2 **to SARS-CoV-2**

3 Douglas F. Lake<sup>1\*#</sup>, Alexa J. Roeder<sup>1\*</sup>, Erin Kaleta<sup>2</sup>, Paniz Jasbi<sup>3</sup>, Kirsten Pfeffer<sup>1</sup>,  
4 Calvin Koelbel<sup>1</sup> Sivakumar Periasamy<sup>4,5</sup> Natalia Kuzmina<sup>4,5</sup> Alexander Bukreyev<sup>4,5,6</sup>,  
5 Thomas E. Grys<sup>2</sup>, Liang Wu<sup>7</sup>, John R Mills<sup>7</sup>, Kathrine McAulay<sup>2</sup>, Maria Gonzalez-Moa<sup>8</sup>,  
6 Alim Seit-Nebi<sup>8</sup>, and Sergei Svarovsky<sup>8</sup>

7  
8 Affiliations:

- 9 1. School of Life Sciences, Arizona State University, Tempe AZ, USA  
10 2. Mayo Clinic Arizona, Department of Laboratory Medicine and Pathology,  
11 Scottsdale, AZ, USA  
12 3. College of Health Solutions, Arizona State University, Phoenix AZ, USA  
13 4. Department of Pathology, University of Texas Medical Branch at Galveston,  
14 Galveston, TX USA  
15 5. Galveston National Laboratory, University of Texas Medical Branch at Galveston,  
16 Galveston, TX USA  
17 6. Department of Microbiology and Immunology University of Texas Medical Branch  
18 at Galveston, Galveston, TX USA  
19 7. Mayo Clinic Rochester, Department of Laboratory Medicine and Pathology,  
20 Rochester, MN USA  
21 8. Axim Biotechnologies Inc, San Diego, CA USA

22 \*Co-first authors

23

24 #Address correspondence to Douglas F. Lake, [douglas.lake@asu.edu](mailto:douglas.lake@asu.edu)

25

26 Word Count: 2498

27

28 **Abstract:**

29 **Background:** After receiving a COVID-19 vaccine, most recipients want to know if they  
30 are protected from infection and for how long. Since neutralizing antibodies are a  
31 correlate of protection, we developed a lateral flow assay (LFA) that measures levels of  
32 neutralizing antibodies from a drop of blood. The LFA is based on the principle that  
33 neutralizing antibodies block binding of the receptor-binding domain (RBD) to  
34 angiotensin-converting enzyme 2 (ACE2).

35 **Methods:** The ability of the LFA was assessed to correctly measure neutralization of  
36 sera, plasma or whole blood from patients with COVID-19 using SARS-CoV-2  
37 microneutralization assays. We also determined if the LFA distinguished patients with  
38 seasonal respiratory viruses from patients with COVID-19. To demonstrate the  
39 usefulness of the LFA, we tested previously infected and non-infected COVID-19  
40 vaccine recipients at baseline and after first and second vaccine doses.

41 **Results:** The LFA compared favorably with SARS-CoV-2 microneutralization assays  
42 with an area under the ROC curve of 98%. Sera obtained from patients with seasonal  
43 coronaviruses did not show neutralizing activity in the LFA. After a single mRNA  
44 vaccine dose, 87% of previously infected individuals demonstrated high levels of  
45 neutralizing antibodies. However, if individuals were not previously infected only 24%  
46 demonstrated high levels of neutralizing antibodies after one vaccine dose. A second  
47 dose boosted neutralizing antibody levels just 8% higher in previously infected  
48 individuals, but over 63% higher in non-infected individuals.

49 **Conclusions:** A rapid, semi-quantitative, highly portable and inexpensive neutralizing  
50 antibody test might be useful for monitoring rise and fall in vaccine-induced neutralizing  
51 antibodies to COVID-19.

52

53 **KEYWORDS**

54 Neutralizing Antibodies, COVID-19, SARS-CoV-2, Lateral Flow Assay, RBD, ACE2

## 55 INTRODUCTION

56 Severe Acute Respiratory Syndrome Coronavirus-2 (SARS-CoV-2) causes  
57 COVID-19 and originated in Wuhan, China in December 2019 [1–3]. Vaccines continue  
58 to be tested [4,5] with the goal of preventing COVID-19 via induction of neutralizing  
59 antibodies (NAbs) and anti-viral T cells. Vaccine trials show that RNA vaccines elicit  
60 protective immunity, but durability of natural and vaccine-induced immunity is not fully  
61 known [5]. Several groups reported that up to one-third of serum samples from  
62 individuals who recovered from COVID-19 do not neutralize SARS-CoV-2 [6–8].  
63 Whether previously infected or vaccinated, it is informative for individuals to learn if they  
64 generated high levels of NAbs so that they can resume normal activities without fear of  
65 re-infection and transmitting the virus [9–11].

66 Viral neutralization assays measure antibodies that block infection of host cells.  
67 The gold standard of neutralization for SARS-CoV-2 measures reduction of viral  
68 plaques or foci in microneutralization assays. These assays are slow, laborious, require  
69 highly trained personnel and a BSL3 facility. Another challenge is that neutralization  
70 assays require careful titration of virus and depend on host cells for infection, both of  
71 which add variability to the assay. These limitations prevent use of SARS-CoV-2  
72 neutralization assays for clinical applications.

73 SARS-CoV-2 uses receptor binding domain (RBD) on spike protein to bind  
74 angiotensin converting enzyme 2 (ACE2) on host cells; RBD appears to be the principal  
75 neutralizing domain [12,13]. Using this knowledge, we developed a lateral flow assay  
76 (LFA) that measures levels of NAbs which block RBD from binding to ACE2. Other  
77 groups have developed RBD-ACE2-based competition ELISAs[18,19] but none have

78 developed a rapid, highly portable, semi-quantitative test that can easily be incorporated  
79 into clinical settings or research studies where traditional laboratory or neutralization  
80 tests are not practical.

81

## 82 MATERIALS AND METHODS

### 83 *Human Subjects and Samples*

84 Serum and finger-stick blood samples were collected for this study under an  
85 Arizona State University institutional review board (IRB)-approved protocol  
86 #0601000548 and Mayo Clinic IRB protocol #20-004544. Serum samples obtained  
87 from excess clinical samples at Mayo Clinic were left over from normal workflow.  
88 COVID-19 samples ranged from 3 to 84 days post PCR positive result.

89 Twenty-seven control serum samples from patients with non-COVID-19  
90 respiratory illnesses as determined by the FilmArray Respiratory Panel 2 (Biofire  
91 Diagnostics) were collected from patients from 2/14/17 – 4/6/20 as part of routine  
92 clinical workflow. All residual clinical samples were stored at 2-8°C for up to 7 days, and  
93 frozen at -80°C thereafter.

94

### 95 *SARS-CoV-2 Microneutralization Assay*

96 A microneutralization assay was performed using a recombinant SARS-CoV-2  
97 expressing mNeonGreen (SARS-CoV-2ng) as previously described [16]. Inhibitory  
98 concentrations for which 50% of virus is neutralized by serum antibodies (IC<sub>50</sub> values)  
99 were obtained on a set of 38 COVID-19 sera. Sixty µl aliquots of SARS-CoV-2ng were  
100 pre-incubated for 1 h in 5% CO<sub>2</sub> at 37°C with 60µl 2-fold serum dilutions in cell culture

101 media, and 100 $\mu$ l were inoculated onto Vero-E6 monolayers in black polystyrene 96-  
102 well plates with clear bottoms (Corning) in duplicate. The final amount of the virus was  
103 200 PFU/well, the starting serum dilution was 1:20 and the end dilution was 1:1280  
104 unless an IC<sub>50</sub> was not reached in which case serum was diluted to 1:10240. Cells were  
105 maintained in Minimal Essential Medium (ThermoFisher Scientific) supplemented by 2%  
106 FBS (HyClone) and 0.1% gentamycin in 5% CO<sub>2</sub> at 37°C. After 2 days of incubation,  
107 fluorescence intensity of infected cells was measured at 488 nm using a Synergy 2 Cell  
108 Imaging Reader (Biotek). Signal was normalized to virus alone with no serum added  
109 and reported as percent neutralization. IC<sub>50</sub> was calculated with GraphPad Prism 6.0  
110 software. Work was performed in a BSL-3 biocontainment laboratory of the University of  
111 Texas Medical Branch, Galveston, TX.

112

### 113 *Serologic Antibody Assay*

114 The Ortho Vitros Anti-SARS-CoV-2 IgG test (Ortho Vitros test) was performed on  
115 an Ortho Clinical Diagnostics Vitros 3600 Immunodiagnosics System at the Mayo  
116 Clinic. This assay is approved for clinical testing under FDA Emergency Use  
117 Authorization to qualitatively detect antibody to the S1 subunit of SARS-CoV-2 spike  
118 protein. Results are reported as reactive (S/CO  $\geq$  1.0) or nonreactive (S/CO  $<$ 1.0).  
119 Specimens were tested within 7 days of collection and stored at 2-8°C. The same 38  
120 serum samples were run in the Ortho Vitros test, microneutralization assay, and the  
121 LFA.

122

123

124 *Lateral Flow Neutralizing Antibody Assay*

125           The Lateral Flow NAb assay was developed to measure levels of antibodies that  
126 compete with ACE2 for binding to RBD. The LFA single port cassette (Empowered  
127 Diagnostics) contains a test strip composed of a sample pad, blood filter, conjugate pad,  
128 nitrocellulose membrane striped with test and control lines, and an absorbent pad (Axim  
129 Biotechnologies Inc). The LFA also contains a control mouse antibody conjugated to  
130 red gold nanospheres and corresponding anti-mouse IgG striped at the control line.

131           LFAs were run at room temperature on a flat surface for 10 minutes prior to  
132 reading results. To perform the test, 6.7µl of serum or 10ul whole blood were added to  
133 the sample port followed by 60µl of chase buffer. After 10 minutes, densities of both test  
134 and control lines were recorded in an iDetekt RDS-2500 density reader.

135           The test leverages the interaction between RBD-conjugated green-gold  
136 nanoshells (Nanocomposix) that bind ACE2 at the test line when RBD-neutralizing  
137 antibodies (RBD-NAbs) are absent or low. Test line density is inversely proportional to  
138 RBD-NAbs present within the sample. As a semi-quantitative test, the results of the LFA  
139 can be interpreted using a scorecard or a densitometer. A red line across from the “C”  
140 indicates that the test ran properly. An absent or faint test line indicates high levels of  
141 RBD-NAbs, whereas a dark test line suggests low or lack of RBD-NAbs.

142

143           Precision testing was performed using sera from one highly, and one non-  
144 neutralizing donor in replicates of 10. Density values were recorded as above  
145 and %CVs calculated using the formula: (Standard Deviation/Mean) \* 100%.

146

## 147 *Data Analysis*

148 Pearson's correlation ( $r$ ) was conducted to assess the strength and significance of  
149 associations between the LFA, the Ortho Vitros test and  $IC_{50}$  values. Regression analysis  
150 using  $IC_{50}$  values evaluated consistency [14] while Bland-Altman plots assessed  
151 agreement and bias [17,18]. Correlation analysis was conducted using IBM SPSS. For  
152 two-group analysis,  $IC_{50}$  values corresponding to  $>240$  were categorized as titer of  $\geq 1:320$   
153 (neutralizing), whereas  $IC_{50}$  values  $\leq 240$  were categorized as  $\leq 1:160$  (low/non-  
154 neutralizing). Receiver operating characteristic (ROC) analysis was performed to assess  
155 accuracy, sensitivity, and specificity of the LFA and Ortho Vitros tests in assessing  
156 neutralization; optimal cutoffs for each method were established to maximize area under  
157 curve (AUC) [19,20]. ROC analysis was conducted using R language in the RStudio  
158 environment (version 3.6.2; RStudio PBC). All analyses were conducted using raw values;  
159 data were not normalized, transformed, or scaled.

160

## 161 RESULTS

162 As shown at the bottom in **Figure 1A**, serum containing high levels of NAbs  
163 results in a weak or ghost test line because NAbs bind RBD on green-gold beads,  
164 preventing RBD from binding to the ACE2 receptor at the test line. Serum with low  
165 levels of NAbs results in a strong test line because little to no antibodies prevent RBD  
166 on beads from binding to ACE2. **Figure 1B** demonstrates results of the test using  
167 COVID-19 sera with different levels of NAbs.

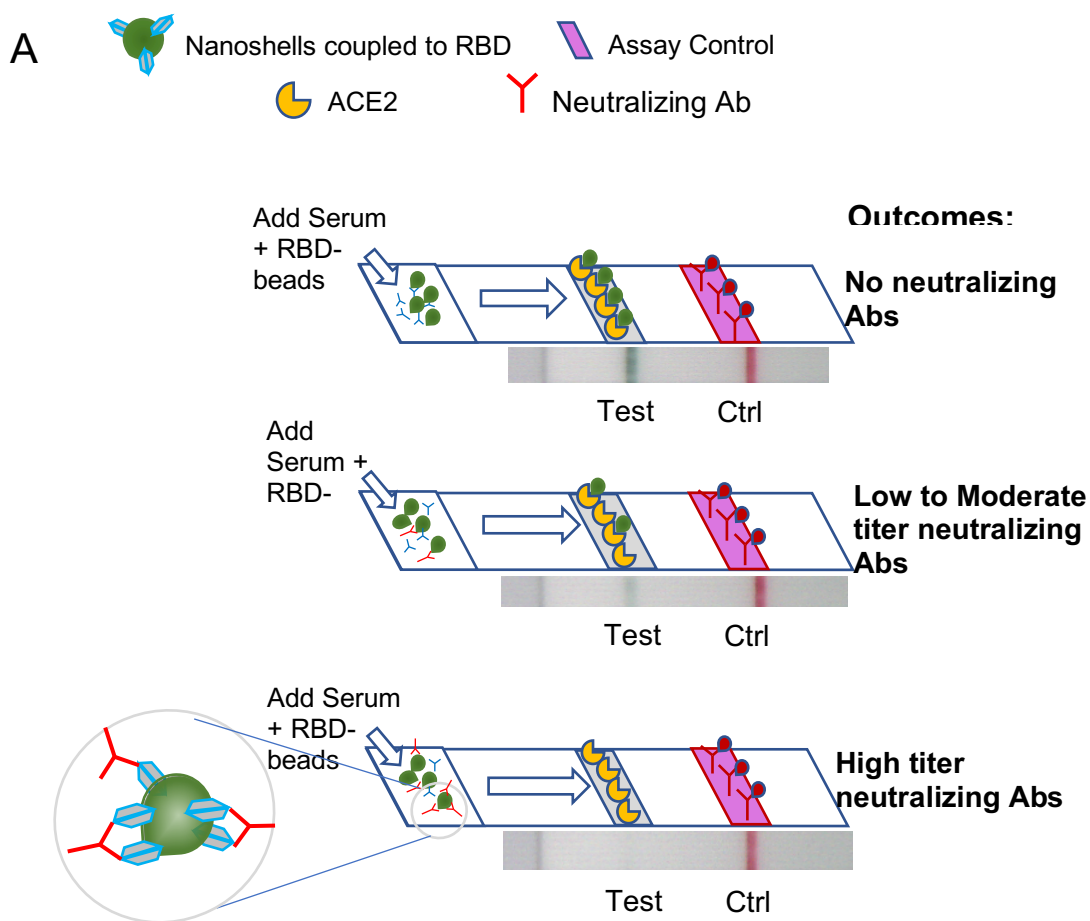

168

**B**

169

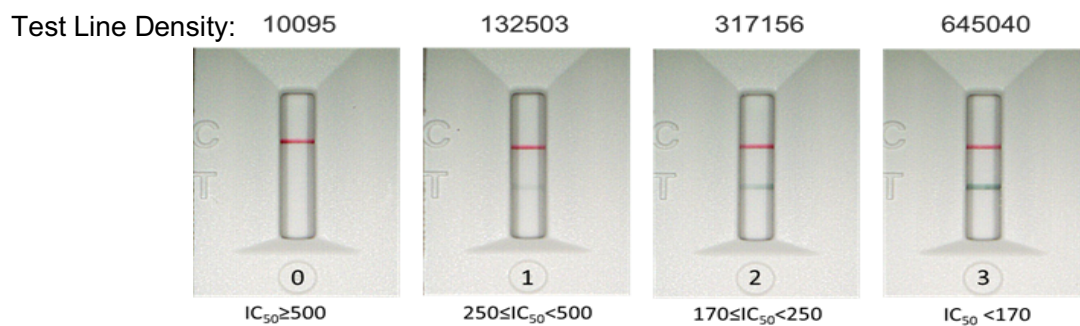

170 **Figure 1. (A)** Schematic of Neutralization LFA. Below each graphic is a representative  
171 image of a lateral flow strip demonstrating actual line density. Addition of non-  
172 COVID19-immune serum or plasma (*top*) does not block binding of RBD-beads (green  
173 particles) to ACE2 resulting in the RBD-bead–ACE2 complex creating a visible line.  
174 Addition of patient serum with moderate titer NABs to the sample pad creates a weak  
175 line (*middle*). Addition of patient serum with high titer NABs ( $> 1:640$ ) blocks binding of



176 RBD-beads to ACE2 such that no line is observed at the test location on the strip  
177 (*bottom*). Red control line represents capture of a mouse monoclonal antibody coupled  
178 to red beads. **(B)** Scorecard for measuring levels of NAb. Red control line across  
179 from the “C” on the cassette indicates that the test ran properly and the green test line  
180 across from the “T” can be used to measure the ability of plasma or serum to block RBD  
181 on gold nanoshells from binding to ACE2. **(0)** represents patient serum producing a  
182 visually non-existent line with density units of 10,095 and an  $IC_{50} > 500$  ( $IC_{50} = 1151$ ); **(1)**  
183 represents patient serum with a line density of 132,503 and an  $IC_{50}$  of 396; **(2)**  
184 represents patient serum with a line density of 239,987 and an  $IC_{50}$  of 243; **(3)**  
185 represents patient serum with a line density of 485,665 and an  $IC_{50}$  of 96.

186

187 To support the application of the LFA to measure NAb levels to SARS-CoV-2, we  
188 tested 38 serum samples that were assigned  $IC_{50}$  values in a SARS-CoV-2  
189 microneutralization assay [16]. The experiment was performed in a blinded manner  
190 such that personnel running either the LFA or the microneutralization assay did not  
191 know the results of the comparator test. When line densities from the LFA were plotted  
192 against  $IC_{50}$  values determined in the microneutralization assay, serum samples with  
193 strong neutralization activity demonstrated low line densities; this indicates that NAb  
194 inhibited RBD from binding to ACE2 (**Figure 2**).

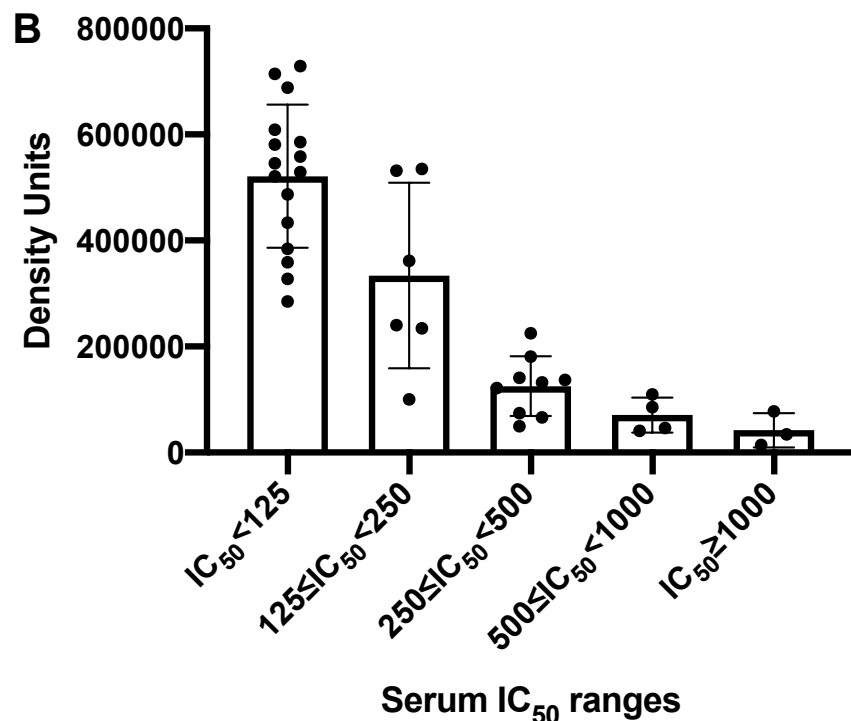

195

196 **Figure 2.** Comparison of RBD-ACE2 competition LFA density values with IC<sub>50</sub> values  
197 determined in a SARS-CoV-2 microneutralization assay on 38 samples (collected 3 to  
198 90 days after PCR positive result). Ranges of IC<sub>50</sub> values are shown on the X-axis  
199 plotted against LFA line density units on the Y-axis.

200

201

202

203 Next, we determined if the LFA detected neutralization activity in serum samples

204 collected from patients with other PCR-confirmed respiratory viruses including seasonal

205 coronaviruses (**Figure 3A**) and for serum samples collected prior to December 2019

206 (**Figure 3B**). Neither seasonal respiratory virus sera, nor pre-December 2019 samples  
showed neutralizing activity.

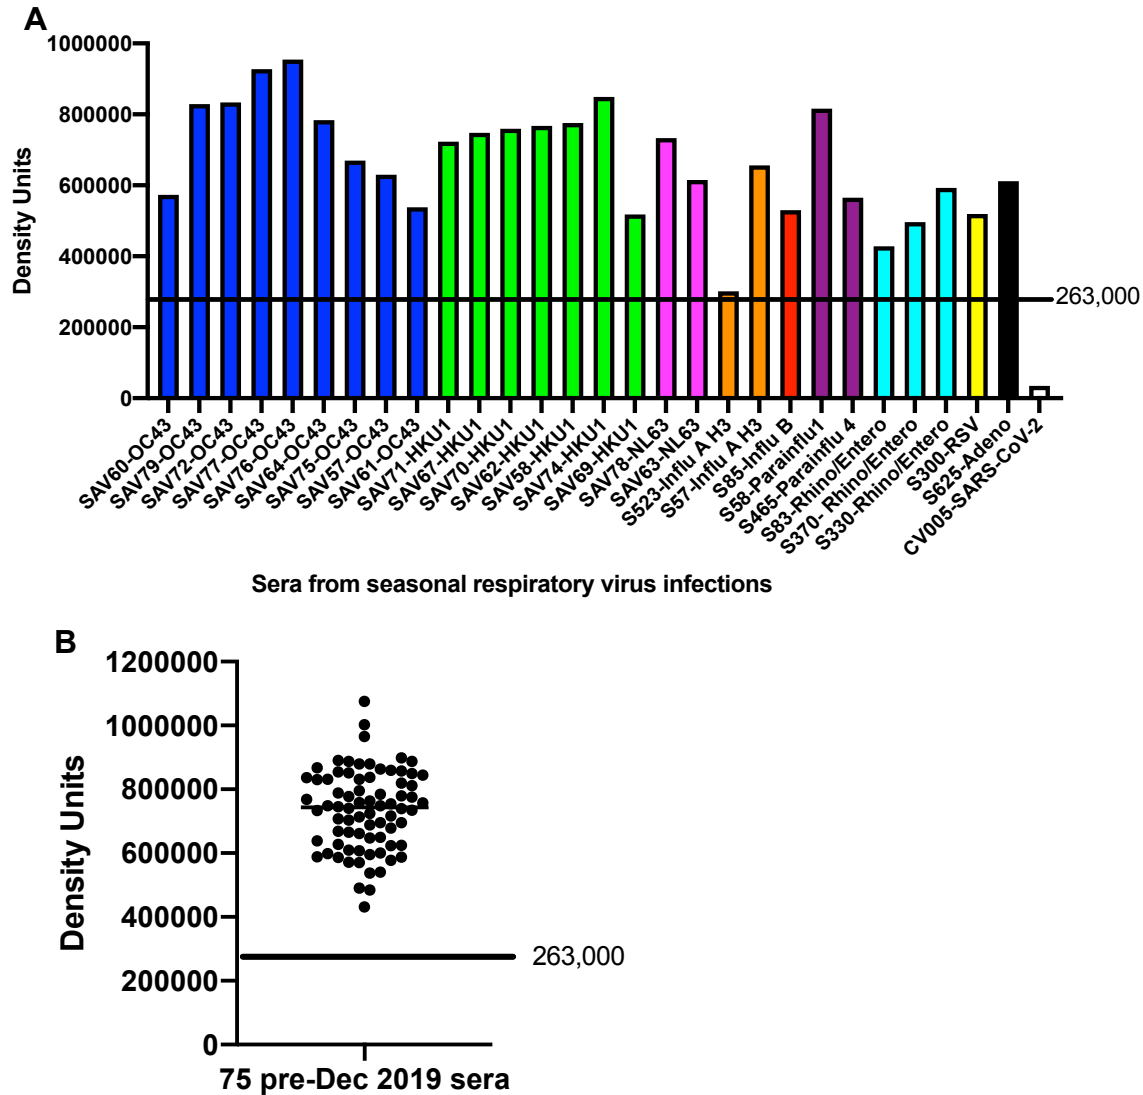

207

208 **Figure 3. A)** Serum samples collected with PCR-confirmed diagnosis of seasonal  
 209 respiratory viruses (Coronavirus OC43, blue; Coronavirus HKU-1, green; Coronavirus  
 210 NL-63, pink; influenza A, orange, influenza B, red ; parainfluenza, purple ; rhinovirus,  
 211 teal ; respiratory syncycial virus, yellow ; and adenovirus, black were run on the LFA as  
 212 described in Methods. A positive control serum from a convalescent COVID-19 patient  
 213 is shown on the far right of the bar graph in white. **B)** Serum samples collected pre-  
 214 December 2019. Cutoff value of 263,000 density units was calculated based on  
 215 receiver operating characteristic curves (see Figure 6).

216

217 We then compared both the Ortho Vitros test and our LFA to sera with IC<sub>50</sub> values  
218 determined in the SARS-CoV-2 microneutralization assay using 38 COVID-19 sera. To  
219 assess agreement between our LFA and the Ortho Vitros test, density units from the LFA  
220 and values from the Ortho test were regressed onto IC<sub>50</sub> values (**Supplemental Figure**  
221 **S1**).

222

223

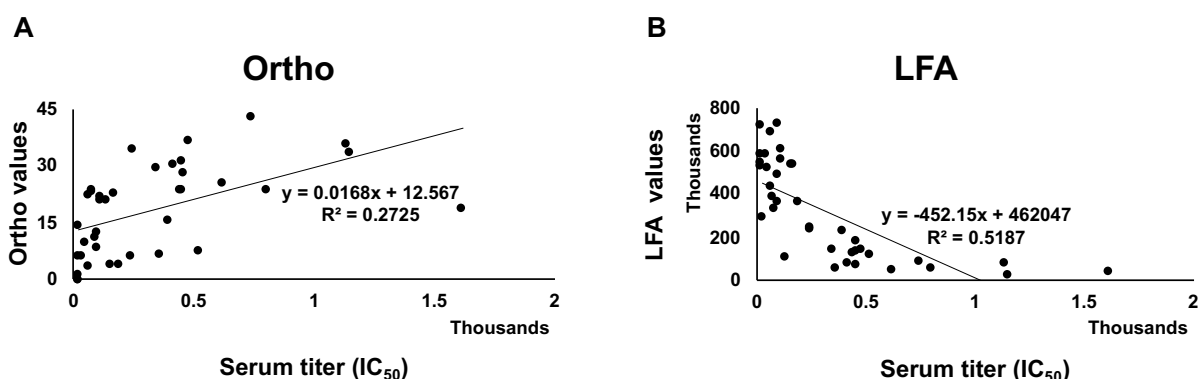

224 **Supplemental Figure S1.** Regression analysis between (A) LFA and serum titer, and  
225 (B) Ortho Vitros SARS-CoV-2 IgG test and titer. Regression plots show explained  
226 variance ( $R^2$ ) between compared methods. Thirty-eight samples were tested.  
227

228

229 LFA values accounted for roughly 52% of observed variance in IC<sub>50</sub> values, while  
230 the Ortho Vitros test accounted for approximately 27% of IC<sub>50</sub> variance. LFA showed  
231 significant negative correlation with IC<sub>50</sub> values ( $r = -0.720$ ,  $p < 0.001$ ), while the Ortho  
232 Vitros test values showed a significant positive correlation to IC<sub>50</sub> values ( $r = 0.522$ ,  $p =$   
233  $0.001$ ). Additionally, the LFA and Ortho Vitros test values correlated with each other ( $r =$   
234  $-0.572$ ,  $p < 0.001$ ).

235 To evaluate bias, mean differences and 95% confidence intervals (CIs) were  
236 calculated and plotted alongside limits of agreement (**Figure 4**). Both LFA and Ortho

237 Vitros test values showed strong agreement with titer, although the Ortho Vitros test  
238 showed a tendency to underestimate neutralizing capacity while the LFA method showed  
239 no bias.  
240

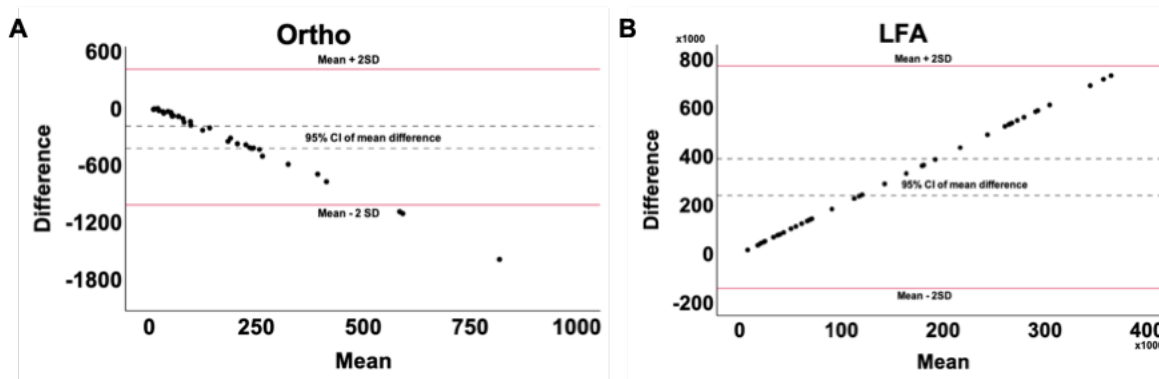

241  
242 **Figure 4.** Bland-Altman plots showing bias (mean difference and 95% CI) and  
243 computed limits of agreement (mean difference  $\pm$  2SD) between **(A)** Ortho Vitros Anti-  
244 SARS-CoV-2 IgG test and IC<sub>50</sub> values and **(B)** our LFA and IC<sub>50</sub> values. Thirty-eight  
245 samples were tested.

246  
247  
248 ROC analysis was performed to assess the ability of the LFA and the Ortho Vitros  
249 test to classify low/non-neutralizing (Neg, <1:160), and highly neutralizing groups ( $\geq$ 1:320)  
250 **(Figure 5)**. As shown in **Figure 5B** and **5D**, the LFA misclassified one non-neutralizing  
251 sample (Neg, <1:160) as neutralizing ( $\geq$ 1:320) which the Ortho Vitros test also  
252 misclassified as neutralizing. The Ortho test also incorrectly classified five additional  
253 neutralizing samples as non-neutralizing.

254 Our LFA showed high accuracy for classification of neutralizing samples (AUC =  
255 0.978), while the Ortho Vitros test showed modest accuracy (AUC = 0.856). Notably, while  
256 both methods showed roughly 90% sensitivity, the Ortho Vitros test showed only 70%

257 specificity. In contrast, the LFA showed perfect specificity (100%) in this analysis of 38  
258 samples.

259 Optimal cutoffs were computed to maximize AUC. For the LFA, density unit values  
260 below 263,000 classify samples as neutralizing and correspond to titers  $\geq 1:320$ . Density  
261 values above this LFA cutoff classify samples in the non-neutralizing group. For the Ortho  
262 Vitros test, values between 0 and 23.3 were representative of non-neutralizing capacity,  
263 whereas values above 23.3 were reflective of the neutralizing group.

264

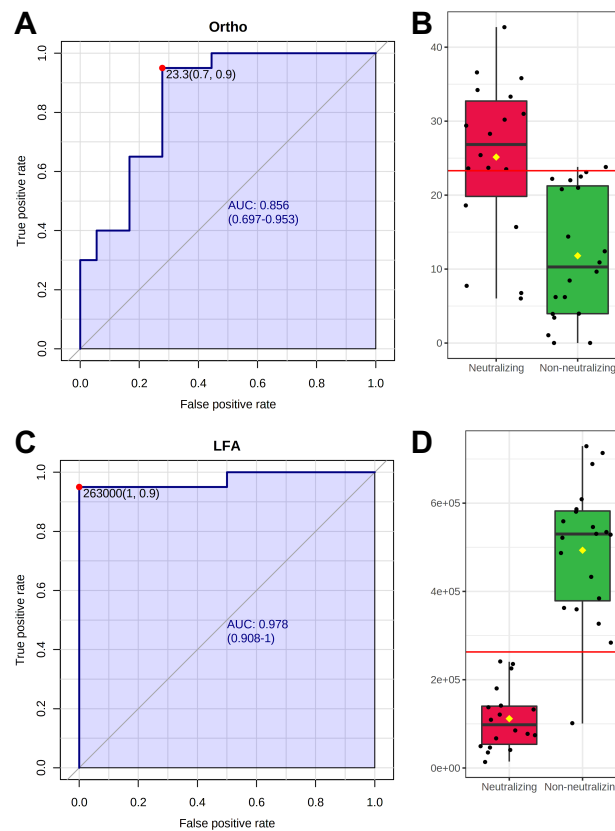

265 **Figure 5. (A)** Univariate ROC analysis of Ortho Vitros Anti-SARS-CoV-2 IgG test for  
 266 discrimination of neutralizing samples ( $\geq 1:320$ ) [AUC: 0.856, 95% CI: 0.697—0.953,  
 267 sensitivity = 0.9, specificity = 0.7]. **(B)** Box plot of Ortho Vitros Anti-SARS-CoV-2 IgG test  
 268 values between neutralizing ( $\geq 1:320$ ) and non-neutralizing (Neg—1:160) groups. **(C)**  
 269 Univariate ROC analysis of LFA for discrimination of neutralizing samples ( $\geq 1:320$ ) [AUC:  
 270 0.978, 95% CI: 0.908—1.0, sensitivity = 0.9, specificity = 1.0]. **(D)** Box plot of LFA values  
 271 between neutralizing ( $\geq 1:320$ ) and non-neutralizing (Neg—1:160) groups.

272  
 273 Precision studies were performed on replicate samples (n=10) and showed a CV  
 274 of ~9% from a serum sample in the high neutralizing range and ~6% CV in a serum  
 275 sample from the low neutralizing range (Supplemental Table 1).

276

| Low Neutralizing Range |             |             |                     |
|------------------------|-------------|-------------|---------------------|
| 10 min                 | C           | T           | T/C Ratio at 10 min |
| 1                      | 503764      | 932173      | 1.850416068         |
| 2                      | 484316      | 944154      | 1.949458618         |
| 3                      | 509424      | 902070      | 1.770764628         |
| 4                      | 441318      | 840951      | 1.905544301         |
| 5                      | 484558      | 990076      | 2.043255916         |
| 6                      | 472319      | 906922      | 1.920147189         |
| 7                      | 519936      | 971429      | 1.868362645         |
| 8                      | 495254      | 992223      | 2.00346287          |
| 9                      | 467545      | 816303      | 1.745934616         |
| 10                     | 534262      | 941643      | 1.762511652         |
| Average                | 491269.6    | 923794.4    | 1.88198585          |
| STD Dev                | 25849.98843 | 55966.17114 | 0.096780674         |
| %CV                    | 5.26        | 6.06        | 5.14                |

| High Neutralizing Range |             |             |                     |
|-------------------------|-------------|-------------|---------------------|
| 10 min                  | C           | T           | T/C Ratio at 10 min |
| 1                       | 415421      | 232022      | 0.558522559         |
| 2                       | 404845      | 286183      | 0.706895232         |
| 3                       | 419873      | 261146      | 0.621964261         |
| 4                       | 417475      | 248141      | 0.594385293         |
| 5                       | 409970      | 263808      | 0.64348123          |
| 6                       | 397812      | 294120      | 0.739344213         |
| 7                       | 409681      | 237096      | 0.578733209         |
| 8                       | 412275      | 242082      | 0.587185738         |
| 9                       | 373751      | 222959      | 0.596544223         |
| 10                      | 373339      | 224335      | 0.600888201         |
| Average                 | 403444.2    | 251189.2    | 0.622794416         |
| STD Dev                 | 16097.74032 | 23457.01668 | 0.055137744         |
| %CV                     | 3.99        | 9.34        | 8.85                |

277

278 **Supplemental Table 1.** Precision study using one Low Neutralizing Range serum  
 279 sample and one High Neutralizing Range serum sample in replicates of ten. Low range  
 280 neutralization is defined as densities from 370,000 – 800,000. The used for precision  
 281 analysis was from an individual who recovered from COVID-19 but did not neutralize  
 282 virus in the microneutralization assay ( $IC_{50} < 20$ ). High neutralization range samples are  
 283 defined as densities from 10,000 – 369,999. This sample has an  $IC_{50}$  of 248.

284

285 Precision studies were performed on replicate samples (n=10) and showed a CV  
 286 of ~9% from a serum sample in the high neutralizing range and ~6% CV in a serum  
 287 sample from the low neutralizing range (**Supplemental Table 1**).

288  
289 Since NAb levels may be considered correlates of protection, we tested sera  
290 from RNA vaccine recipients (mRNA-1723 and BNT162b2) in “previously infected” and  
291 “not previously infected” individuals using finger-stick blood in the rapid LFA (**Figure 6**).  
292 In *previously infected* individuals at baseline (within 3 months of PCR-based diagnosis),  
293 38% demonstrated high levels of NABs. After the first vaccine dose, 87% of *previously*  
294 *infected* individuals demonstrated high NAb levels, while only 24% of *not previously*  
295 *infected* individuals developed high levels of NABs. After the second vaccine dose,  
296 levels of NABs increased to 95% in the *previously infected* cohort, while NAb levels  
297 increased to 87% in the *not previously infected* cohort. This data suggests that a  
298 second vaccine dose is important for highest levels of NABs.  
299

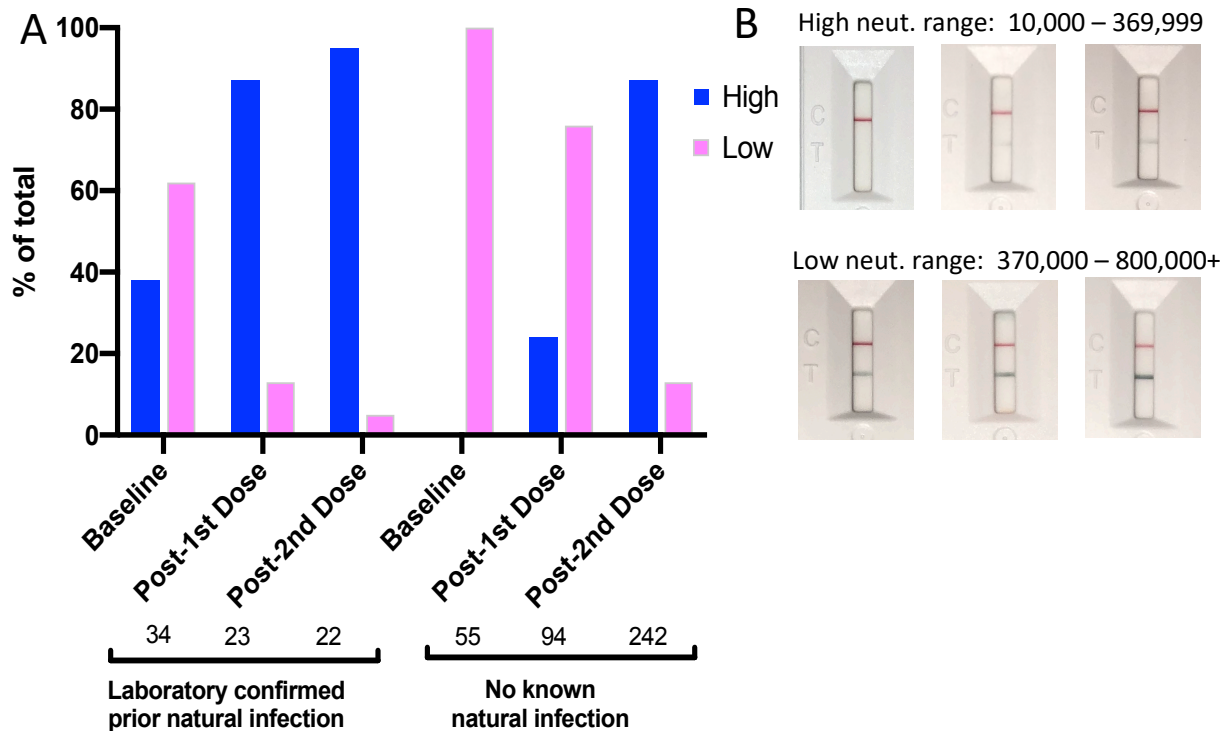

300



301 **Figure 6. NAb levels in prior infection and vaccine-induced individuals. (A)**  
302 Baseline indicates within one week of first vaccine dose; Post-1<sup>st</sup> Dose indicates within  
303 one week of 2<sup>nd</sup> vaccine dose; Post 2<sup>nd</sup> Dose indicates 10-20 days after 2<sup>nd</sup> vaccine  
304 dose. High and Low indicates density ranges of Test lines shown in (B). Densities were  
305 read in a reader as described in Methods. Serum titers that correspond to high range  
306 densities are >1:1280 to ≥1:160. Serum titers corresponding to low range densities are  
307 <1:160.

308

## 309 DISCUSSION

310 We developed a rapid test that measures levels of NAbs in serum and whole  
311 blood. As shown in **Figure 2**, the LFA correlates well with serologic titers determined  
312 using a SARS-CoV-2 microneutralization assay, especially when serum sample IC<sub>50</sub>  
313 values are >250. Advantages of the LFA test are that it can be inexpensively and  
314 rapidly deployed to determine levels of NAbs in vaccine recipients. Moreover, the test  
315 can be used longitudinally to evaluate duration of protective immunity in naturally  
316 infected and vaccinated individuals—many more than could ever be evaluated using  
317 BSL2 or BSL3-based neutralization assays.

318

319 The LFA and Ortho Vitros test showed a significant correlation with each other ( $r$   
320 = -0.572,  $p < 0.001$ ), displaying good linear relation ( $r = -0.720$ ,  $p < 0.001$ )[21]. The LFA  
321 accounts for 52% of observed IC<sub>50</sub> variance ( $R^2 = 0.5187$ ), while the Ortho Vitros test  
322 accounts for 27% ( $R^2 = 0.2725$ ). Although absolute quantitation demands an excellent  
323 coefficient of determination ( $R^2 \geq 0.99$ )[22], variables with  $R^2 \geq 0.5$  are highly predictive  
324 in univariate regression models while measures with  $R^2 < 0.5$  are recommended for use  
325 in multivariate models with complementary measures to increase predictive accuracy

326 [23,24]. Bland-Altman analysis (**Figure 4**) showed the Ortho Vitros test to be prone to  
327 underestimation of IC<sub>50</sub> values, while the LFA method did not exhibit over- or  
328 underestimation bias. Furthermore, across mean values for both methods, the LFA  
329 showed discrete differential values while the Ortho Vitros test struggled to differentiate  
330 high neutralizing samples.

331

332 Using our rapid test to measure NABs in previously infected vaccine recipients  
333 and those who were not infected agrees with other studies in BSL3 facilities using  
334 serum from venipuncture blood [5,25–29]. Natural infection may not elicit high levels of  
335 NABs [6–8], but a first dose of vaccine induces high levels of NABs in the majority of  
336 recipients similar to 2 doses of vaccine in non-previously infected individuals,  
337 suggesting natural infection primes the immune system[30]. In naïve individuals, a  
338 single dose of vaccine elicits high NAb levels (Titers >1:160) in only 24% of vaccine  
339 recipients, leaving 76% of vaccine recipients with titers lower than 1:160 which would  
340 not qualify for convalescent plasma donation according to FDA memo of March 9,2021.  
341 After a second vaccine dose, the LFA indicated high levels of NABs in 87% of  
342 recipients, identical to levels observed in previously infected individuals after the first  
343 vaccine dose. These findings might suggest that a booster (3<sup>rd</sup> vaccine dose) in non-  
344 infected individuals could induce the highest levels of NABs in the most people.

345

346 Limitations of the LFA are that it uses only the RBD portion of spike protein.  
347 Although the vast majority of reports indicate that the principle neutralizing domain is the  
348 RBD portion of spike protein, mAbs have been reported that neutralize SARS-CoV-2 by

349 binding to the N-terminal domain of spike protein [31,32]. Also, since the spike protein  
350 assumes multiple conformations during viral binding and entry [33], neutralizing  
351 epitopes exist on the quaternary structure of spike [32]. Although RBDs on the  
352 nanoparticles may associate, it is not known if they assume a native conformation.

353 Other limitations are the binary nature of this data analysis (high and low  
354 neutralizing) of a continuous assay. NAb levels should be evaluated longitudinally to  
355 assess rise and fall in NAb levels; this rapid test is well-suited for that role. Another  
356 limitation is that the LFA does not differentiate high affinity anti-RBD NAb from an  
357 abundance of lower affinity anti-RBD NAb.

358 This test may prove useful in monitoring COVID-19 vaccine recipients as a  
359 correlate of protection. It would be logistically difficult to obtain a tube of blood from  
360 every vaccine recipient for BSL3 work. However, since this LFA requires only a drop of  
361 blood, individual use of this test might lead to more comprehensive longitudinal  
362 monitoring of protective humoral immunity and indicate when boosters might be  
363 required.

364  
365

## 366 AUTHOR CONTRIBUTIONS

367 DL, SS and AS-N developed the LFA. AJ performed the experiments and interpreted  
368 the results. PJ performed statistical analysis. EK, TG and KM contributed samples.  
369 CK, AJ and KP tested vaccine recipients and interpreted results. SP, NK and AB  
370 performed SARS-CoV-2 microneutralization assays and interpreted results LW and JM  
371 contributed samples for preliminary experiments. MM-G designed the strip layout and  
372 produced the strips for the vaccine study.

373

## 374 CONFLICTS OF INTEREST STATEMENT

375 DL and SS are co-founders of Sapphire, the research division of Axim Biotech. SS, MM-  
376 G and AS-N are employees of Axim Biotech. Other authors have no conflicts regarding  
377 this work.

378

## 379 FUNDING

380 This study was funded in part by Axim Biotech, San Diego, CA

381

## 382 References

- 383 [1] I. Ghinai, T.D. McPherson, J.C. Hunter, H.L. Kirking, D. Christiansen, K. Joshi, R. Rubin, S.  
384 Morales-Estrada, S.R. Black, M. Pacilli, M.J. Fricchione, R.K. Chugh, K.A. Walblay, N.S.  
385 Ahmed, W.C. Stoecker, N.F. Hasan, D.P. Burdsall, H.E. Reese, M. Wallace, C. Wang, D.  
386 Moeller, J. Korpics, S.A. Novosad, I. Benowitz, M.W. Jacobs, V.S. Dasari, M.T. Patel, J.  
387 Kauerauf, E.M. Charles, N.O. Ezike, V. Chu, C.M. Midgley, M.A. Rolfes, S.I. Gerber, X. Lu, S.  
388 Lindstrom, J.R. Verani, J.E. Layden, S. Brister, K. Goldesberry, S. Hoferka, D. Jovanov, D.  
389 Nims, L. Saathoff-Huber, C. Hoskin Snelling, H. Adil, R. Ali, E. Andreychak, K. Bemis, M.  
390 Frias, P. Quartey-Kumapley, K. Baskerville, E. Murphy, E. Murskyj, Z. Noffsinger, J. Vercillo,  
391 A. Elliott, U.S. Onwuta, D. Burck, G. Abedi, R.M. Burke, R. Fagan, J. Farrar, A.M. Fry, A.J.  
392 Hall, A. Haynes, C. Hoff, S. Kamili, M.E. Killerby, L. Kim, S.A. Kujawski, D.T. Kuhar, B. Lynch,  
393 L. Malapati, M. Marlow, J.R. Murray, B. Rha, S.K.K. Sakthivel, S.E. Smith-Jeffcoat, E. Soda, L.  
394 Wang, B.L. Whitaker, T.M. Uyeki, First known person-to-person transmission of severe  
395 acute respiratory syndrome coronavirus 2 (SARS-CoV-2) in the USA, *The Lancet*. 395 (2020)  
396 1137–1144. [https://doi.org/10.1016/S0140-6736\(20\)30607-3](https://doi.org/10.1016/S0140-6736(20)30607-3).
- 397 [2] C. Huang, Y. Wang, X. Li, L. Ren, J. Zhao, Y. Hu, L. Zhang, G. Fan, J. Xu, X. Gu, Z. Cheng, T. Yu,  
398 J. Xia, Y. Wei, W. Wu, X. Xie, W. Yin, H. Li, M. Liu, Y. Xiao, H. Gao, L. Guo, J. Xie, G. Wang, R.  
399 Jiang, Z. Gao, Q. Jin, J. Wang, B. Cao, Clinical features of patients infected with 2019 novel  
400 coronavirus in Wuhan, China, *The Lancet*. 395 (2020) 497–506.  
401 [https://doi.org/10.1016/S0140-6736\(20\)30183-5](https://doi.org/10.1016/S0140-6736(20)30183-5).
- 402 [3] R. Li, S. Pei, B. Chen, Y. Song, T. Zhang, W. Yang, J. Shaman, Substantial undocumented  
403 infection facilitates the rapid dissemination of novel coronavirus (SARS-CoV-2), *Science*.  
404 368 (2020) 489–493. <https://doi.org/10.1126/science.abb3221>.
- 405 [4] F.P. Polack, S.J. Thomas, N. Kitchin, J. Absalon, A. Gurtman, S. Lockhart, J.L. Perez, G. Pérez  
406 Marc, E.D. Moreira, C. Zerbini, R. Bailey, K.A. Swanson, S. Roychoudhury, K. Koury, P. Li,  
407 W.V. Kalina, D. Cooper, R.W. Frenck, L.L. Hammitt, Ö. Türeci, H. Nell, A. Schaefer, S. Ünal,

- 408 D.B. Tresnan, S. Mather, P.R. Dormitzer, U. Şahin, K.U. Jansen, W.C. Gruber, Safety and  
409 Efficacy of the BNT162b2 mRNA Covid-19 Vaccine, *N. Engl. J. Med.* 383 (2020) 2603–2615.  
410 <https://doi.org/10.1056/NEJMoa2034577>.
- 411 [5] A.T. Widge, N.G. Roupael, L.A. Jackson, E.J. Anderson, P.C. Roberts, M. Makhene, J.D.  
412 Chappell, M.R. Denison, L.J. Stevens, A.J. Pruijssers, A.B. McDermott, B. Flach, B.C. Lin, N.A.  
413 Doria-Rose, S. O’Dell, S.D. Schmidt, K.M. Neuzil, H. Bennett, B. Leav, M. Makowski, J.  
414 Albert, K. Cross, V.-V. Edara, K. Floyd, M.S. Suthar, W. Buchanan, C.J. Luke, J.E.  
415 Ledgerwood, J.R. Mascola, B.S. Graham, J.H. Beigel, Durability of Responses after SARS-  
416 CoV-2 mRNA-1273 Vaccination, *N Engl J Med.* (2020) 4.
- 417 [6] D.F. Robbiani, C. Gaebler, F. Muecksch, J.C.C. Lorenzi, Z. Wang, A. Cho, M. Agudelo, C.O.  
418 Barnes, A. Gazumyan, S. Finkin, T. Hagglof, T.Y. Oliveira, C. Viant, A. Hurley, H.-H.  
419 Hoffmann, K.G. Millard, R.G. Kost, M. Cipolla, K. Gordon, F. Bianchini, S.T. Chen, V. Ramos,  
420 R. Patel, J. Dizon, I. Shimeliovich, P. Mendoza, H. Hartweger, L. Nogueira, M. Pack, J.  
421 Horowitz, F. Schmidt, Y. Weisblum, E. Michailidis, A.W. Ashbrook, E. Waltari, J.E. Pak, K.E.  
422 Huey-Tubman, N. Koranda, P.R. Hoffman, A.P. West, C.M. Rice, T. Hatziioannou, P.J.  
423 Bjorkman, P.D. Bieniasz, M. Caskey, M.C. Nussenzweig, Convergent Antibody Responses to  
424 SARS-CoV-2 Infection in Convalescent Individuals, *Immunology*, 2020.  
425 <https://doi.org/10.1101/2020.05.13.092619>.
- 426 [7] J.A. Juno, H.-X. Tan, W.S. Lee, A. Reynaldi, H.G. Kelly, K. Wragg, R. Esterbauer, H.E. Kent, C.J.  
427 Batten, F.L. Mordant, N.A. Gherardin, P. Pymm, M.H. Dietrich, N.E. Scott, W.-H. Tham, D.I.  
428 Godfrey, K. Subbarao, M.P. Davenport, S.J. Kent, A.K. Wheatley, Immunogenic profile of  
429 SARS-CoV-2 spike in individuals recovered from COVID-19, *Infectious Diseases (except*  
430 *HIV/AIDS)*, 2020. <https://doi.org/10.1101/2020.05.17.20104869>.
- 431 [8] F. Wu, A. Wang, M. Liu, Q. Wang, J. Chen, S. Xia, Y. Ling, Y. Zhang, J. Xun, L. Lu, S. Jiang, H.  
432 Lu, Y. Wen, J. Huang, Neutralizing antibody responses to SARS-CoV-2 in a COVID-19  
433 recovered patient cohort and their implications, *MedRxiv Prepr.* (2020) 20.  
434 <https://doi.org/10.1101/2020.03.30.20047365>.
- 435 [9] Z. Han, F. Battaglia, S.R. Terlecky, Discharged COVID-19 Patients Testing Positive Again for  
436 SARS-CoV-2 RNA: A Minireview of Published Studies from China, *J. Med. Virol.* (2020)  
437 *jmv.26250*. <https://doi.org/10.1002/jmv.26250>.
- 438 [10] G. Ye, Z. Pan, Y. Pan, Q. Deng, L. Chen, J. Li, Y. Li, X. Wang, Clinical characteristics of severe  
439 acute respiratory syndrome coronavirus 2 reactivation, *J. Infect.* 80 (2020) e14–e17.  
440 <https://doi.org/10.1016/j.jinf.2020.03.001>.
- 441 [11] V.T. Hoang, T.L. Dao, P. Gautret, Recurrence of positive SARS-CoV-2 in patients recovered  
442 from COVID-19, *J. Med. Virol.* (2020) *jmv.26056*. <https://doi.org/10.1002/jmv.26056>.
- 443 [12] Q. Wang, Y. Zhang, L. Wu, S. Niu, C. Song, Z. Zhang, G. Lu, C. Qiao, Y. Hu, K.-Y. Yuen, Q.  
444 Wang, H. Zhou, J. Yan, J. Qi, Structural and Functional Basis of SARS-CoV-2 Entry by Using  
445 Human ACE2, *Cell.* (2020) S009286742030338X.  
446 <https://doi.org/10.1016/j.cell.2020.03.045>.
- 447 [13] L. Premkumar, B. Segovia-Chumbez, R. Jadi, D.R. Martinez, R. Raut, A. Markmann, C.  
448 Cornaby, L. Bartelt, S. Weiss, Y. Park, C.E. Edwards, E. Weimer, E.M. Scherer, N. Roupael,  
449 S. Edupuganti, D. Weiskopf, L.V. Tse, Y.J. Hou, D. Margolis, A. Sette, M.H. Collins, J.  
450 Schmitz, R.S. Baric, A.M. de Silva, The receptor binding domain of the viral spike protein is

- 451 an immunodominant and highly specific target of antibodies in SARS-CoV-2 patients, *Sci.*  
452 *Immunol.* 5 (2020) eabc8413. <https://doi.org/10.1126/sciimmunol.abc8413>.
- 453 [14] C.W. Tan, W.N. Chia, X. Qin, P. Liu, M.I.-C. Chen, C. Tiu, Z. Hu, V.C.-W. Chen, B.E. Young,  
454 W.R. Sia, Y.-J. Tan, R. Foo, Y. Yi, D.C. Lye, D.E. Anderson, L.-F. Wang, A SARS-CoV-2  
455 surrogate virus neutralization test based on antibody-mediated blockage of ACE2–spike  
456 protein–protein interaction, *Nat. Biotechnol.* (2020). [https://doi.org/10.1038/s41587-020-](https://doi.org/10.1038/s41587-020-0631-z)  
457 [0631-z](https://doi.org/10.1038/s41587-020-0631-z).
- 458 [15] Q.M. Hanson, K.M. Wilson, M. Shen, Z. Itkin, R.T. Eastman, P. Shinn, M.D. Hall, Targeting  
459 ACE2-RBD interaction as a platform for COVID19 therapeutics: Development and drug  
460 repurposing screen of an AlphaLISA proximity assay, *Biochemistry*, 2020.  
461 <https://doi.org/10.1101/2020.06.16.154708>.
- 462 [16] X. Xie, A. Muruato, K.G. Lokugamage, K. Narayanan, X. Zhang, J. Zou, J. Liu, C. Schindewolf,  
463 N.E. Bopp, P.V. Aguilar, K.S. Plante, S.C. Weaver, S. Makino, J.W. LeDuc, V.D. Menachery,  
464 P.-Y. Shi, An Infectious cDNA Clone of SARS-CoV-2, *Cell Host Microbe.* 27 (2020) 841-  
465 848.e3. <https://doi.org/10.1016/j.chom.2020.04.004>.
- 466 [17] Davide Giavarina, Understanding Bland Altman analysis, *Biochem. Medica.* 25 (2015) 141–  
467 151. <https://doi.org/10.11613/BM.2015.015>.
- 468 [18] N.Ö. Doğan, Bland-Altman analysis: A paradigm to understand correlation and agreement,  
469 *Turk. J. Emerg. Med.* 18 (2018) 139–141. <https://doi.org/10.1016/j.tjem.2018.09.001>.
- 470 [19] N.A. Obuchowski, J.A. Bullen, Receiver operating characteristic (ROC) curves: review of  
471 methods with applications in diagnostic medicine, *Phys Med Biol.* (2018) 29.
- 472 [20] C.T. Nakas, C.T. Yannoutsos, Ordered multiple-class ROC analysis with continuous  
473 measurements, *Med. Stat.* 23 (November 30) 3437–49. <https://doi.org/10.1002/sim.1917>.
- 474 [21] P. Schober, C. Boer, L.A. Schwarte, Correlation Coefficients: Appropriate Use and  
475 Interpretation, *Anesth. Analg.* 126 (2018) 1763–1768.  
476 <https://doi.org/10.1213/ANE.0000000000002864>.
- 477 [22] J.D. Rights, S.K. Sterba, Quantifying explained variance in multilevel models: An integrative  
478 framework for defining R-squared measures, *Psychol. Methods.* 24 (n.d.) 309–338.  
479 <https://doi.org/10.1037/met0000184>.
- 480 [23] J.D. Rights, S.K. Sterba, A framework of R-squared measures for single-level and multilevel  
481 regression mixture models, *Psychol. Methods.* 23 (n.d.) 434–457.  
482 <https://doi.org/10.1037/met0000139>.
- 483 [24] J.D. Rights, S.K. Sterba, New Recommendations on the Use of R-Squared Differences in  
484 Multilevel Model Comparisons, *Multivar. Behav. Res.* 55 (n.d.) 568–599.
- 485 [25] L.A. Jackson, E.J. Anderson, N.G. Rouphael, P.C. Roberts, M. Makhene, R.N. Coler, M.P.  
486 McCullough, J.D. Chappell, M.R. Denison, L.J. Stevens, A.J. Pruijssers, A. McDermott, B.  
487 Flach, N.A. Doria-Rose, K.S. Corbett, K.M. Morabito, S. O’Dell, S.D. Schmidt, P.A. Swanson,  
488 M. Padilla, J.R. Mascola, K.M. Neuzil, H. Bennett, W. Sun, E. Peters, M. Makowski, J. Albert,  
489 K. Cross, W. Buchanan, R. Pikaart-Tautges, J.E. Ledgerwood, B.S. Graham, J.H. Beigel, An  
490 mRNA Vaccine against SARS-CoV-2 — Preliminary Report, *N. Engl. J. Med.* 383 (2020)  
491 1920–1931. <https://doi.org/10.1056/NEJMoa2022483>.
- 492 [26] A. Lombardi, G. Bozzi, R. Ungaro, S. Villa, V. Castelli, D. Mangioni, A. Muscatello, A. Gori, A.  
493 Bandera, Mini Review Immunological Consequences of Immunization With COVID-19

- 494 mRNA Vaccines: Preliminary Results, *Front. Immunol.* 12 (2021) 657711.  
495 <https://doi.org/10.3389/fimmu.2021.657711>.
- [27] U. Sahin, A. Muik, E. Derhovanessian, I. Vogler, L.M. Kranz, M. Vormehr, A. Baum, K. Pascal, J. Quandt, D. Maurus, S. Brachtendorf, V. Lörks, J. Sikorski, R. Hilker, D. Becker, A.-K. Eller, J. Grützner, C. Boesler, C. Rosenbaum, M.-C. Kühnle, U. Luxemburger, A. Kemmer-Brück, D. Langer, M. Bexon, S. Bolte, K. Karikó, T. Palanche, B. Fischer, A. Schultz, P.-Y. Shi, C. Fontes-Garfias, J.L. Perez, K.A. Swanson, J. Loschko, I.L. Scully, M. Cutler, W. Kalina, C.A. Kyratsous, D. Cooper, P.R. Dormitzer, K.U. Jansen, Ö. Türeci, COVID-19 vaccine BNT162b1 elicits human antibody and TH1 T cell responses, *Nature*. 586 (2020) 594–599.  
503 <https://doi.org/10.1038/s41586-020-2814-7>.
- [28] E.J. Anderson, N.G. Rouphael, A.T. Widge, L.A. Jackson, P.C. Roberts, M. Makhene, J.D. Chappell, M.R. Denison, L.J. Stevens, A.J. Pruijssers, A.B. McDermott, B. Flach, B.C. Lin, N.A. Doria-Rose, S. O’Dell, S.D. Schmidt, K.S. Corbett, P.A. Swanson, M. Padilla, K.M. Neuzil, H. Bennett, B. Leav, M. Makowski, J. Albert, K. Cross, V.V. Edara, K. Floyd, M.S. Suthar, D.R. Martinez, R. Baric, W. Buchanan, C.J. Luke, V.K. Phadke, C.A. Rostad, J.E. Ledgerwood, B.S. Graham, J.H. Beigel, Safety and Immunogenicity of SARS-CoV-2 mRNA-1273 Vaccine in Older Adults, *N. Engl. J. Med.* 383 (2020) 2427–2438.  
511 <https://doi.org/10.1056/NEJMoa2028436>.
- [29] N. Doria-Rose, M.S. Suthar, M. Makowski, S. O’Connell, A.B. McDermott, B. Flach, J.E. Ledgerwood, J.R. Mascola, B.S. Graham, B.C. Lin, S. O’Dell, S.D. Schmidt, A.T. Widge, V.-V. Edara, E.J. Anderson, L. Lai, K. Floyd, N.G. Rouphael, V. Zarnitsyna, P.C. Roberts, M. Makhene, W. Buchanan, C.J. Luke, J.H. Beigel, L.A. Jackson, K.M. Neuzil, H. Bennett, B. Leav, J. Albert, P. Kunwar, Antibody Persistence through 6 Months after the Second Dose of mRNA-1273 Vaccine for Covid-19, *N. Engl. J. Med.* (2021) NEJMc2103916.  
518 <https://doi.org/10.1056/NEJMc2103916>.
- [30] J.E. Ebinger, J. Fert-Bober, I. Printsev, M. Wu, N. Sun, J.C. Prostko, E.C. Frias, J.L. Stewart, J.E. Van Eyk, J.G. Braun, S. Cheng, K. Sobhani, Antibody responses to the BNT162b2 mRNA vaccine in individuals previously infected with SARS-CoV-2, *Nat. Med.* (2021).  
522 <https://doi.org/10.1038/s41591-021-01325-6>.
- [31] X. Chi, R. Yan, J. Zhang, G. Zhang, Y. Zhang, M. Hao, Z. Zhang, P. Fan, Y. Dong, Y. Yang, Z. Chen, Y. Guo, J. Zhang, Y. Li, X. Song, Y. Chen, L. Xia, L. Fu, L. Hou, J. Xu, C. Yu, J. Li, Q. Zhou, W. Chen, A neutralizing human antibody binds to the N-terminal domain of the Spike protein of SARS-CoV-2, *Science*. (2020) eabc6952.  
527 <https://doi.org/10.1126/science.abc6952>.
- [32] L. Liu, P. Wang, M.S. Nair, J. Yu, M. Rapp, Q. Wang, Y. Luo, J.F.-W. Chan, V. Sahi, A. Figueroa, X.V. Guo, G. Cerutti, J. Bimela, J. Gorman, T. Zhou, Z. Chen, K.-Y. Yuen, P.D. Kwong, J.G. Sodroski, M.T. Yin, Z. Sheng, Y. Huang, L. Shapiro, D.D. Ho, Potent neutralizing antibodies against multiple epitopes on SARS-CoV-2 spike, *Nature*. 584 (2020) 450–456.  
532 <https://doi.org/10.1038/s41586-020-2571-7>.
- [33] Y. Cai, J. Zhang, T. Xiao, H. Peng, S.M. Sterling, R.M. Walsh, S. Rawson, S. Rits-Volloch, B. Chen, Distinct conformational states of SARS-CoV-2 spike protein, *Science*. (2020) eabd4251. <https://doi.org/10.1126/science.abd4251>.
- 536  
537

538

539

540

541
